RESEARCH ARTICLE

# The prognostic value of CT radiomic features for patients with pulmonary adenocarcinoma treated with EGFR tyrosine kinase inhibitors

Hyungjin Kim<sup>1</sup>, Chang Min Park<sup>1,2,3</sup>\*, Bhumsuk Keam<sup>3,4</sup>\*, Sang Joon Park<sup>1,3</sup>, Miso Kim<sup>4</sup>, Tae Min Kim<sup>3,4</sup>, Dong-Wan Kim<sup>3,4</sup>, Dae Seog Heo<sup>3,4</sup>, Jin Mo Goo<sup>1,2,3</sup>

**1** Department of Radiology, Seoul National University College of Medicine, Seoul, Korea, **2** Institute of Radiation Medicine, Seoul National University Medical Research Center, Seoul, Korea, **3** Seoul National University Cancer Research Institute, Seoul, Korea, **4** Department of Internal Medicine, Seoul National University Hospital, Seoul, Korea

\* These authors contributed equally to this work.

\* [cmpark.morphius@gmail.com](mailto:cmpark.morphius@gmail.com) (CMP); [bhumsuk@snu.ac.kr](mailto:bhumsuk@snu.ac.kr) (BK)

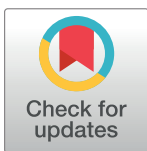

**OPEN ACCESS**

**Citation:** Kim H, Park CM, Keam B, Park SJ, Kim M, Kim TM, et al. (2017) The prognostic value of CT radiomic features for patients with pulmonary adenocarcinoma treated with EGFR tyrosine kinase inhibitors. PLoS ONE 12(11): e0187500. <https://doi.org/10.1371/journal.pone.0187500>

**Editor:** Fan Yang, Peking University People's Hospital, CHINA

**Received:** March 9, 2017

**Accepted:** August 14, 2017

**Published:** November 3, 2017

**Copyright:** © 2017 Kim et al. This is an open access article distributed under the terms of the [Creative Commons Attribution License](https://creativecommons.org/licenses/by/4.0/), which permits unrestricted use, distribution, and reproduction in any medium, provided the original author and source are credited.

**Data Availability Statement:** All relevant data are within the paper and its Supporting Information files.

**Funding:** This study was supported by grant no. 05-2016-0050 from the Seoul National University Hospital Research Fund. <http://www.snuh.org/pub/>. CMP received the funding. The funders had no role in study design, data collection and analysis, decision to publish, or preparation of the manuscript.

## Abstract

### Purpose

To determine if the radiomic features on CT can predict progression-free survival (PFS) in epidermal growth factor receptor (*EGFR*) mutant adenocarcinoma patients treated with first-line EGFR tyrosine kinase inhibitors (TKIs) and to identify the incremental value of radiomic features over conventional clinical factors in PFS prediction.

### Methods

In this institutional review board–approved retrospective study, pretreatment contrast-enhanced CT and first follow-up CT after initiation of TKIs were analyzed in 48 patients (M:F = 23:25; median age: 61 years). Radiomic features at baseline, at 1<sup>st</sup> first follow-up, and the percentage change between the two were determined. A Cox regression model was used to predict PFS with nonredundant radiomic features and clinical factors, respectively. The incremental value of radiomic features over the clinical factors in PFS prediction was also assessed by way of a concordance index.

### Results

Roundness (HR: 3.91; 95% CI: 1.72, 8.90; P = 0.001) and grey-level nonuniformity (HR: 3.60; 95% CI: 1.80, 7.18; P<0.001) were independent predictors of PFS. For clinical factors, patient age (HR: 2.11; 95% CI: 1.01, 4.39; P = 0.046), baseline tumor diameter (HR: 1.03; 95% CI: 1.01, 1.05; P = 0.002), and treatment response (HR: 0.46; 95% CI: 0.24, 0.87; P = 0.017) were independent predictors. The addition of radiomic features to clinical factors significantly improved predictive performance (concordance index; combined model = 0.77, clinical-only model = 0.69, P<0.001).

**Competing interests:** The authors have declared that no competing interests exist.

## Conclusions

Radiomic features enable PFS estimation in *EGFR* mutant adenocarcinoma patients treated with first-line EGFR TKIs. Radiomic features combined with clinical factors provide significant improvement in prognostic performance compared with using only clinical factors.

## Introduction

Lung cancer is the leading cause of cancer death worldwide and non-small cell lung cancer (NSCLC) is the largest subgroup, occupying about 85% of cases [1]. The prognosis of NSCLC still remains poor with no more than a 10-month median overall survival rate with conventional chemotherapy [2]. Several molecular-targeted agents, including epidermal growth factor receptor (EGFR) tyrosine kinase inhibitors (TKIs), have emerged in the recent decades along with the concept of personalized medicine. Large-scale clinical trials have repeatedly shown the benefits of EGFR TKI in *EGFR* mutation-positive NSCLC patients [2]. For example, the OPTIMAL study compared erlotinib with chemotherapy as a first-line treatment in Asian patients which demonstrated that EGFR TKI could significantly prolong progression-free survival (PFS) (median PFS 13.1 months versus 4.6 months) [3].

Despite their dramatic initial responses and prolonged survival, all of the patients eventually developed resistance to EGFR TKI [1]. The median PFS after treatment with a first-generation EGFR TKI in patients with *EGFR* mutations is typically less than one year [1]. Thus, prediction of PFS in these patients is significant as the predicted survival before the initiation of therapy may guide the aggressiveness of treatment, or may help to prepare for additional treatment options, at the estimated time of acquiring resistance.

Prediction of treatment responses and survival rates, based on images from patients receiving EGFR TKI, has been investigated by several researchers [4–10]. They reported the utility of quantitative parameters of positron emission tomography (PET) or computed tomography (CT) in depicting patient prognosis. Recently, radiomic approaches, which analyze the gray level of pixels and their spatial distribution with high-throughput feature extraction, have been suggested and a few studies have shown compelling evidence for the potential of this method in NSCLC patients [5, 11–15]. However, the prognostic implication of CT radiomic features in a homogeneous set of patients with adenocarcinoma and *EGFR*-sensitizing mutations has yet to be described.

Therefore, we aimed to determine if the radiomic features on CT images at baseline and first follow-up, or the percentage change between baseline and first follow-up, can predict PFS in *EGFR*-mutant adenocarcinoma patients treated with first-line EGFR TKIs. We also sought to identify the incremental value of radiomic features over conventional clinical factors in PFS estimation.

## Materials and methods

This retrospective analysis was approved by the institutional review board of Seoul National University Hospital (IRB No. 1609-060-791) with waivers of informed consent from involved patients as the data were analyzed retrospectively and anonymously.

## Study population

We retrospectively reviewed a consecutive database of NSCLC patients and identified 415 patients who were treated with first-line EGFR TKIs (gefitinib or erlotinib) until disease

progression from October 2005 to April 2015 [10, 16–19]. Among these patients, the study population was determined based on the following criteria: patients with 1) biopsy-confirmed *EGFR*-mutant adenocarcinoma, 2) at least one measurable lung lesion ( $\geq 10\text{mm}$ ), 3) contrast-enhanced chest CT scans taken prior to (baseline) and after EGFR TKIs (first follow-up), 4) CT scans reconstructed with filtered back projection, and 5) CT scans of 2.5–3mm slice thickness (the routine follow-up CT protocol of our institution is comprised of 2.5 or 3mm thicknesses). CT scans reconstructed with iterative reconstruction algorithms were excluded as iterative reconstruction may increase the variability of radiomic features [20]. Patients were excluded if they had lesions with adjacent atelectasis or consolidation which could impede proper tumor segmentation.

The inclusion and exclusion criteria yielded 48 patients for analysis (Fig 1). There were 23 men (median age, 65 years; range, 42–85 years) and 25 women (median age, 61 years; range, 38–85 years). 46 patients were treated with gefitinib and two patients received erlotinib. The median interval between the baseline (before TKI initiation) and first follow-up CT was 9.6 weeks (interquartile range, 7.9–11.0 weeks). Detailed patient characteristics, including clinical prognostic factors and TKI treatments, are described in Table 1.

### CT image acquisition

CT scans were performed with six different scanners from three manufacturers. All patients underwent contrast-enhanced CT scans from lung apex to base at suspended maximum inspiration. Detailed information regarding the scanning protocols can be found in S1 Protocol.

In addition, a separate CT dataset of solid pulmonary nodule from 43 patients was prepared to analyze inter-reader intraclass correlation coefficients (ICCs) of radiomic features. CT examinations were performed using a 64-detector row Definition scanner at full inspiration state. Detailed scanning parameters are also described in S1 Protocol.

### Clinical factors and PFS

Patient age, sex, stage (according to the 7<sup>th</sup> edition of *The American Joint Committee on Cancer Staging Manual*), smoking status, Eastern Cooperative Oncology Group (ECOG) Performance Status Score (PS), presence of extrathoracic metastasis, and *EGFR* sensitizing mutation were

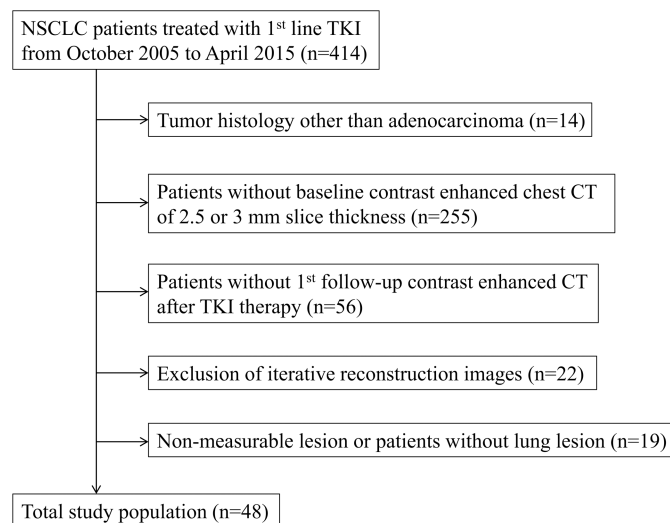

**Fig 1. Flow chart of patient selection including inclusion, and exclusion, criteria.**

<https://doi.org/10.1371/journal.pone.0187500.g001>

**Table 1. Patient characteristics, clinical factors, and TKI treatment.**

| Characteristics                                     | Category             | Value            |
|-----------------------------------------------------|----------------------|------------------|
| Median age (year)                                   |                      | 61 (38–85)       |
| Sex                                                 | Male                 | 23 (47.9)        |
|                                                     | Female               | 25 (52.1)        |
| Stage                                               | IIIB                 | 2 (4.2)          |
|                                                     | IV                   | 46 (95.8)        |
| Smoking status                                      | Current or ex-smoker | 22 (45.8)        |
|                                                     | Never smoker         | 26 (54.2)        |
| ECOG PS <sup>a</sup>                                | 0                    | 1 (2.1)          |
|                                                     | 1                    | 33 (68.8)        |
|                                                     | 2                    | 2 (4.2)          |
| Extrathoracic metastasis                            | Absent               | 17 (35.4)        |
|                                                     | Present              | 31 (64.6)        |
| Tumor diameter at baseline (mm) <sup>b</sup>        |                      | 30.5 (10.0–78.2) |
| Tumor diameter at first follow-up (mm) <sup>b</sup> |                      | 22.4 (6.2–64.6)  |
| Sensitizing <i>EGFR</i> mutation                    | Exon 18 G719         | 1 (2.1)          |
|                                                     | Exon 19 deletion     | 18 (37.5)        |
|                                                     | Exon 21 L858R        | 29 (60.4)        |
| EGFR TKI                                            | Gefitinib            | 46 (95.8)        |
|                                                     | Erlotinib            | 2 (4.2)          |
| Treatment response at first follow-up               | Responder            | 25 (52.1)        |
|                                                     | Non-responder        | 23 (47.9)        |
| Progression-free survival (month) <sup>c</sup>      |                      | 9.7 (5.0–13.8)   |

Note: Unless otherwise specified, data are numbers of patients (with percentages in parentheses).

<sup>a</sup>Data were not available in 12 patients.

<sup>b</sup>Data are median (with range of data in parentheses).

<sup>c</sup>Data are median (with interquartile range in parentheses).

ECOG PS, Eastern Cooperative Oncology Group Performance Status Score; *EGFR*, epidermal growth factor receptor; TKI, tyrosine kinase inhibitors

<https://doi.org/10.1371/journal.pone.0187500.t001>

recorded from electronic medical records. Baseline tumor size, before EGFR TKI initiation and tumor size at first follow-up were also obtained. Tumor size (longest diameter) was measured on an axial plane of CT image using electronic caliper. In addition, treatment response of patients assessed at first follow-up CT was also recorded. Patients were classified into either responders (complete or partial remission) or nonresponders (stable or progressive disease) based on Response Evaluation Criteria in Solid Tumors (RECIST) version 1.1 criteria [21]. Lastly, PFS was measured from the date of EGFR TKI therapy initiation until the date of progression (or any cause of death).

### Radiomic feature extraction

Nodule segmentation was processed as follows: First, digital imaging and communications in medicine (DICOM) files were transferred from the picture archiving and communication system (PACS) to a personal computer and then loaded to an in-house software program (Medical Imaging Solution for Segmentation and Texture Analysis) [22–26]. This in-house software program was implemented using dedicated C++ language with Microsoft Foundation Classes (Microsoft, Redmond, WA). The tumor boundary was segmented manually with freehand

drawing on each axial slice of CT images to include the entire tumor volume. Segmentation was performed for a dominant measurable lung lesion (one lesion per patient).

After nodule segmentation, radiomic features were extracted automatically from the software program. We obtained a total of 37 features. The features types were: 1) first-order statistics based features (15 features), 2) size and shape features (8 features), 3) gray-level co-occurrence matrix (GLCM) based features (5 features), 4) gray-level run-length matrix (GLRL) based feature (1 feature), and 5) wavelet transformed GLRL features (8 features) (Table 2).

### Exclusion of unstable features

Nodule segmentation was initially performed by one radiologist (H.K. with 7 years of experience in chest CT) and one CT technician (M.L. with 5 years of research experience in chest CT) for the independent, solid-pulmonary nodule CT dataset to evaluate the inter-reader variability of radiomic features and to identify any unstable features for exclusion. ICCs were calculated based on the two sets of radiomic features from each observer. Features with inter-reader ICC <0.9 were excluded from further analysis.

After exclusion of unstable features, a radiologist (H.K.) conducted segmentation for the EGFR TKI patient CT dataset for the following analysis.

### Statistical analysis

Radiomic features were extracted from both baseline and first follow-up CT scans. Then, the percentage change of radiomic features between baseline and first follow-up was calculated as follows:

$$\text{Percentage change of feature A} = \frac{[\text{baseline CT feature A} - \text{first follow-up CT feature A}]}{\text{baseline CT feature A}}$$

Therefore, a total of three radiomic feature sets (baseline, first follow-up after TKI, and percentage change) were acquired for each patient.

With the radiomic features, the pairwise Pearson correlation coefficient was calculated and features with a correlation coefficient of >0.95 were grouped together. This procedure was performed three times with baseline CT features, first follow-up CT features, and percentage features, respectively. Based on the univariate Cox proportional hazards regression analysis, a feature with the smallest P-value was selected from each group. Dichotomized radiomic features were used as input variables to the Cox regression analysis. Dichotomization with

**Table 2. Extracted radiomic features.**

| Group                  | Feature                                                                                                                         | No. |
|------------------------|---------------------------------------------------------------------------------------------------------------------------------|-----|
| First-order statistics | mean, standard deviation, variance, skewness, kurtosis, entropy, homogeneity, energy, C5, C10, C25, C50, C75, C90, C95          | 15  |
| Size and shape         | volume, effective diameter, surface area, sphericity, discrete compactness, shape compactness 1, shape compactness 2, roundness | 8   |
| GLCM                   | moments, angular second moment, inverse difference moment, contrast, entropy                                                    | 5   |
| GLRL                   | Grey-level nonuniformity                                                                                                        | 1   |
| Wavelet transformation | decompositions of grey-level nonuniformity                                                                                      | 8   |

C5, C10, . . . , C95, percentile value of the cumulative histogram; GLCM, gray-level co-occurrence matrix; GLRL, gray-level run-length matrix

<https://doi.org/10.1371/journal.pone.0187500.t002>

optimal cutoff was determined, which showed the most significant split at log-rank test [27]. After dimensionality reduction, the P-values of remnant features were adjusted for multiple comparisons using the Benjamini-Hochberg method. We chose the top four features, based on the corrected P-value, to limit the possibility of over-fitting (according to the Harrell guideline that the number of observations should exceed the number of selected features by, at least, a factor of ten) [28]. These features were used as input variables into the multivariate Cox regression analysis with backward stepwise selection. Independent predictors of PFS were identified from multivariate Cox regression analysis and hazards ratio (HR) and a 95% confidence interval (CI) was determined. Concordance index and its 95% CI were calculated.

Along with the radiomic model for PFS prediction, we investigated the discriminative power of conventional clinical factors for risk stratification in advanced adenocarcinoma patients. ECOG PS was not included in the regression analysis as it was missing in 12 patients. Tumor stage was also excluded (as most patients (95.8%) were stage IV). Age was dichotomized with optimal cutoff. With variables exhibited a P-value of  $<0.20$  at univariate analysis, a multivariate Cox regression analysis was conducted with backward stepwise selection.

Finally, we aimed to compare the incremental value of radiomic features against the conventional clinical factors. Therefore, we built a combined model incorporating both radiomic features and clinical factors. We assessed the performance of the model with concordance index and compared it with the radiomic model and clinical-factor model. Comparison of concordance indices was assessed by means of bootstrapping, with 1,000 repetitions and paired t-tests, performed among values.

Statistical analyses were performed using SPSS 19.0 (IBM SPSS Statistics, Armonk, NY, USA) and R software, version 3.2.2 (<http://www.R-project.org>). Survival analyses were performed with survival package and bootstrapping was executed with boot package in R. A P-value  $<0.05$  was considered as statistical significance.

## Results

### Clinical characteristics and PFS

There was no significant difference in age between male and female participants ( $P = 0.992$ ). The median PFS was 9.7 months (range, 0.3–29.4 months; interquartile range, 5.0–13.8 months). There were 25 (52.1%) responders and 23 (47.9%) nonresponders at first follow-up CT.

### Feature selection

Six features [kurtosis, skewness, wavelet grey-level nonuniformity HHL (high- or low-pass filter along x-, y-, and z-direction), fifth percentile of the cumulative histogram (C5), standard deviation and variance] with inter-reader ICC  $<0.9$  (based on the independent, solid-pulmonary nodule CT dataset) were removed. Then, a pairwise Pearson correlation coefficient was calculated and a univariate Cox regression analysis was performed with the remaining 31 features. Six features were further excluded from the baseline CT features (C10, C25, C50, C90, effective diameter, and wavelet grey-level nonuniformity LHL), eight features were excluded from the first follow-up CT features (mean, C25, C50, C90, volume, effective diameter, surface area, and wavelet grey-level nonuniformity LHL), and two features (volume and effective diameter) were removed from the percentage features. The P-values of the remnant features were adjusted for multiple comparisons using the Benjamini-Hochberg procedure. After correction, 19 features showed a P-value smaller than 0.01 (Table 3). Among them, 11 features were extracted from the first follow-up CT and eight features were extracted from the baseline CT.

**Table 3. Univariate Cox regression analysis of 19 radiomic features.**

| Feature                 | Hazard ratio | Confidence interval |       | P-value |
|-------------------------|--------------|---------------------|-------|---------|
|                         |              | Lower               | Upper |         |
| Discrete compactness_FU | 4.13         | 2.13                | 7.99  | 0.001   |
| Roundness_FU            | 5.51         | 2.48                | 12.25 | 0.001   |
| GLN_FU                  | 4.23         | 2.19                | 8.18  | 0.001   |
| GLCM contrast_FU        | 0.27         | 0.14                | 0.52  | 0.001   |
| C75_FU                  | 3.9          | 1.98                | 7.69  | 0.001   |
| Compactness1            | 3.86         | 1.93                | 7.72  | 0.002   |
| Compantness1_FU         | 3.57         | 1.85                | 6.87  | 0.002   |
| Volume                  | 3.85         | 1.91                | 7.77  | 0.002   |
| LLL_FU                  | 3.27         | 1.7                 | 6.29  | 0.003   |
| LLL                     | 3.93         | 1.82                | 8.5   | 0.004   |
| Energy_FU               | 3.1          | 1.62                | 5.94  | 0.005   |
| GLCM ASM                | 0.31         | 0.16                | 0.62  | 0.006   |
| GLN                     | 3.37         | 1.64                | 6.94  | 0.006   |
| Discrete compactness    | 2.79         | 1.51                | 5.17  | 0.006   |
| GLCM contrast           | 0.32         | 0.16                | 0.64  | 0.006   |
| C10_FU                  | 2.89         | 1.52                | 5.5   | 0.006   |
| GLCM entropy            | 3.12         | 1.55                | 6.25  | 0.006   |
| GLCM entropy_FU         | 2.85         | 1.5                 | 5.41  | 0.006   |
| C95_FU                  | 3.51         | 1.6                 | 7.68  | 0.007   |

Note: Features with underbar and 'FU' denote that those are extracted from the first follow-up CT.

ASM, angular second moment; C10, tenth percentile at cumulative histogram; C75, seventy-fifth percentile at cumulative histogram; C95, ninety-fifth percentile at cumulative histogram; GLN, grey-level nonuniformity; GLCM, gray-level co-occurrence matrix; LLL, wavelet decomposition of grey-level nonuniformity with directional filtering with low-pass filter along x-, y- and z-direction

<https://doi.org/10.1371/journal.pone.0187500.t003>

The final top four features were discrete compactness, roundness, grey-level nonuniformity, and GLCM contrast which were all extracted from the first follow-up CT (Fig 2). The optimal cutoff values used to dichotomize these four features were 0.0487 [hazard ratio (HR): 4.13; 95% CI: 2.13, 7.99, P<0.001] for discrete compactness, 0.7817 (HR: 5.41; 95% CI: 2.45, 11.96, P<0.001) for roundness, 31.93 (HR: 4.23; 95% CI: 2.19, 8.18, P<0.001) for grey-level nonuniformity, and 6066 (HR: 0.27; 95% CI: 0.14, 0.52, P<0.001) for GLCM contrast.

### Multivariate Cox regression analysis

A multivariate Cox regression analysis performed with the four features indicated that roundness (HR: 3.91; 95% CI: 1.72, 8.90; P = 0.001) and grey-level nonuniformity (HR: 3.60; 95% CI: 1.80, 7.18; P<0.001) were independent predictors of PFS (Fig 3). The concordance index of the radiomic model was 0.73 (95% CI: 0.65, 0.82).

The Cox regression analysis was also performed, with clinical factors and treatment response according to RECIST 1.1, on the first follow-up. The optimal cutoff value for age dichotomization was 70.5 (HR: 1.68; 95% CI: 0.86, 3.27, P = 0.120). A multivariate Cox regression analysis revealed that patient age (HR: 2.11; 95% CI: 1.01, 4.39; P = 0.046), baseline tumor diameter (HR: 1.03; 95% CI: 1.01, 1.05; P = 0.002), and treatment response (HR: 0.46; 95% CI: 0.24, 0.87; P = 0.017) were independent clinical predictors. The concordance index of the clinical-factors model was 0.69 (95% CI: 0.60, 0.79) and was significantly lower than that of the radiomic model (P<0.001).

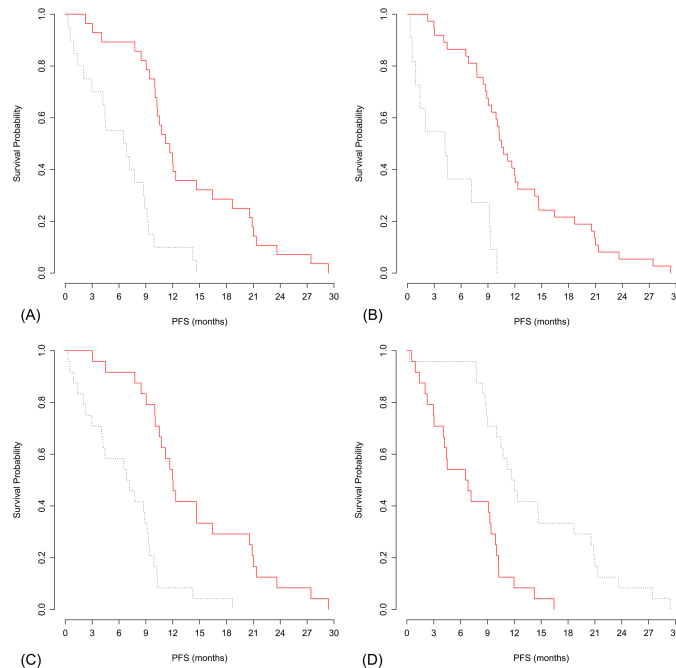

**Fig 2. Graphs of Kaplan-Meier risk groups based on the optimal cutoff of the four radiomic features.** (A) discrete compactness (cutoff: 0.0487), (B) roundness (cutoff: 0.7817), (C) grey-level nonuniformity (cutoff: 31.93), and (D) GLCM contrast (cutoff: 6066). GLCM, gray-level co-occurrence matrix.

<https://doi.org/10.1371/journal.pone.0187500.g002>

Next, we combined the radiomic features with clinical factors to create an integrated prediction model in order to evaluate the incremental value of radiomic features against conventional clinical factors. The concordance index of the combined model was 0.77 (95% CI: 0.67, 0.86), which was significantly higher than those of either the radiomic model or the clinical-factor model (both  $P < 0.001$ ). The addition of radiomic features to the clinical factors

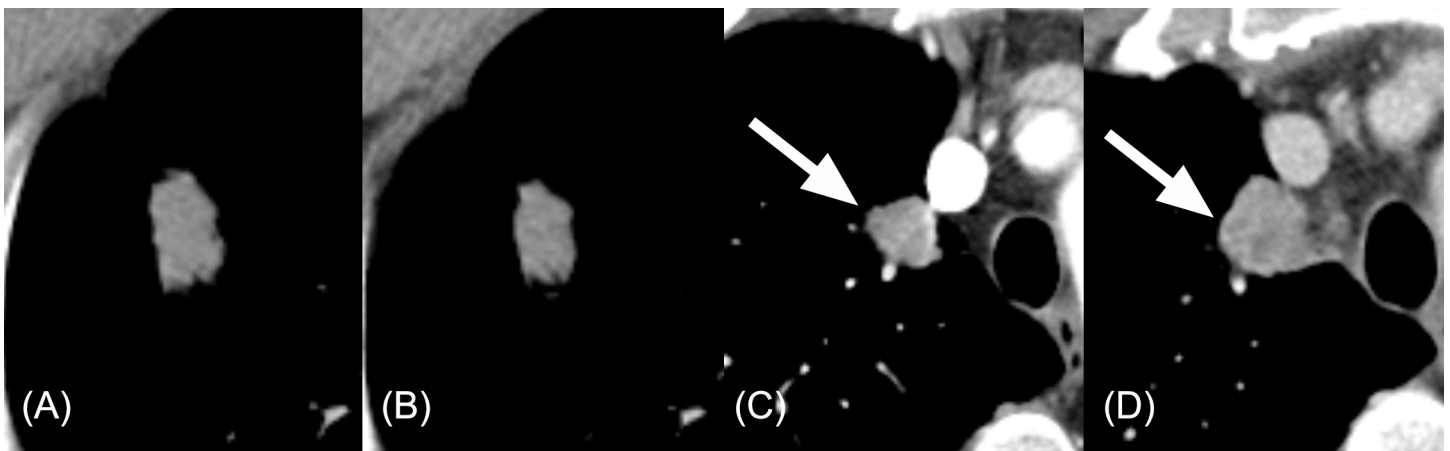

**Fig 3. Radiomic features and their association with progression-free survival (PFS).** (A) On the baseline CT, roundness of the tumor was 0.7352 and grey-level nonuniformity was 23.06. (B) On the first follow-up CT (9 weeks later), roundness was 0.7355 (percent change: 0.0422%) and grey-level nonuniformity decreased to 16.93 (percent change: -26.57%). PFS in this patient was 23.6 months. (C) For this patient, whose PFS was only 1.4 months, tumor roundness was 0.8591 and grey-level nonuniformity was 24.13 on the baseline CT. (D) On the first follow-up CT (9 weeks later), grey-level nonuniformity increased to 43.11 (percent change: 78.63%), while the roundness was 0.8040 (percent change: -6.411%).

<https://doi.org/10.1371/journal.pone.0187500.g003>



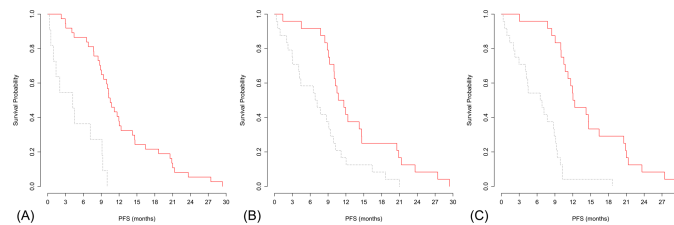

**Fig 4. Kaplan-Meier plots demonstrating the performance of each estimation model.** Patients were divided in to low- and high-probability groups for progression-free survival according to the median value of output from (A) the radiomic model (HR: 5.34, 95% CI: 2.42, 11.76;  $P < 0.001$ ), (B) the clinical-factor model (HR: 2.51, 95% CI: 1.37, 4.59;  $P = 0.003$ ), and (C) the combined model (HR: 5.49, 95% CI: 2.77, 10.89;  $P < 0.001$ ). CI, confidence interval; HR, hazard ratio.

<https://doi.org/10.1371/journal.pone.0187500.g004>

significantly improved the predictive performance of the regression model. Kaplan-Meier plots of the radiomic model, clinical-factor model, and combined model appear in Fig 4.

## Discussion

We have demonstrated that the incorporation of radiomic features along with conventional clinical factors was superior to the performance of clinical-factors alone model in prediction of PFS in *EGFR*-mutant adenocarcinoma patients treated with first-line EGFR TKIs. The radiomic features alone also showed a better outcome in PFS estimation than the sole employment of clinical factors.

Recently, several studies evaluated the prognostic value of radiomic features [5, 11–14, 22, 29, 30]. However, most studies included patient information, such as heterogeneous histology, stage, and treatment. Our study population consisted of patients with advanced-stage (stage IV in 46 out of 48 patients) adenocarcinoma with sensitizing *EGFR* mutations and all of them were treated with EGFR TKI as their first-line systemic therapy. The development of a model which enables risk stratification in clinically-similar patients can be very useful for optimizing treatment plans for individual patients.

It is promising that the radiomic features from the first follow-up CTs promoted PFS prediction. Early prediction of PFS may enable physicians to determine the right time to perform additional biopsies in order to identify acquired resistance such as T790M mutation for screening eligible patients for the novel agent [31]. Treatment response according to RECIST at first follow-up or baseline tumor diameter can also act as indicators in estimating patient survival [32]. However, we showed that the addition of radiomic features to the clinical factors (including treatment response) had a higher discriminative power in PFS prediction than the use of clinical factors alone.

As for the radiomic features of our study, roundness is a three-dimensional morphological index which measures the surface smoothness and structural distortion as the ratio between the diameters of enclosing, and enclosed, spheres based on surface voxels [33]. We added the additional component of radial displacement for surface smoothness. Grey-level nonuniformity is a measure of tumor heterogeneity and is calculated with GLRL [11]. It is interesting that the combination of a morphological index and a texture feature (indicating intratumoral heterogeneity), which are both beyond the perception of the human eye, can work together as a prognostic imaging biomarker. A few studies of radiomic analysis showed that the intratumoral heterogeneity on imaging yielded prognostic information in NSCLC patients [5, 11–13, 22, 30]. Aerts et al. [11] demonstrated that the performance of radiomic signatures, including intensity feature, size feature, and texture feature of grey-level nonuniformity was better than that of TNM staging. Huang et al. [12] also showed that homogeneity, kurtosis, and uniformity

using a filter method were independent biomarkers for the estimation of disease-free survival in early stage (I-II) NSCLC. In a study by Fried et al. [13], disease solidity (volume metric) and GLCM energy were useful for survival prediction in patients with stage III NSCLC. The common finding in these studies, including our own, was that the incorporation of both radiomic features and clinical prognostic factors significantly improved the risk stratification of patients compared with the sole use of the clinical-factors model.

With regard to the NSCLC patients receiving EGFR TKI, Cook et al. [5] performed radiomic analysis with PET/CT and revealed that neighborhood gray-tone difference matrix (NGTDM) contrast at the six-week follow-up, and the percentage change in first-order entropy, were independently associated with survival. In our study, GLCM contrast was included in the top four features, but was not an independent predictor of PFS. In addition, none of the percentage-change features showed statistical significance. The primary difference between our study and the one conducted by Cook et al. [5] is the imaging modality of choice. Future prospective studies involving CT features, PET/CT features, and clinical factors are warranted with large numbers of patients.

We acknowledge a number of limitations to this study. First, we only dealt with a small number of patients. Thus, a separate independent group of patients for testing (or validation) was not available. In addition, k-fold and leave-one-out cross validation were not applied to the study, as such methods yield substantial variability relative to the small sample [34] and were not considered suitable for the current study population. Instead, we performed bootstrapping to calculate the concordance index. Furthermore, the exclusion of the major proportion of patients was to the absence of contrast enhanced CT scans. This exclusion criteria might have induced selection bias as patients with more complicated disease status requiring detailed evaluation of the mediastinum, vessels, or distant metastatic lesions might be chosen. Second, CT protocols were heterogeneous with multiple scanners and acquisition settings. Radiomic features are influenced by both CT scanners [35] and protocols [20, 24, 36, 37]. Therefore, homogeneous and standardized CT acquisition is necessary. However, Aerts et al. [11] showed that the prognostic performance of radiomic features was reproducible with heterogeneous sets of CT images. In fact, the clinical implications of radiomic feature variability (according to CT scanning) have yet to be determined. The effect of scanning protocols on the actual performance of radiomic features is an issue for future analysis. Third, we dealt with only a fraction of radiomic features. A single GLRL-based feature (grey-level nonuniformity) was calculated based on the study by Aerts et al. [11]. However, filter methods such as Laplacian of Gaussian, or the fractal dimension method, were not tested in the present study. Therefore, our study results cannot be applied to features obtained through those methods.

In conclusion, radiomic features enable PFS estimation in *EGFR*-mutant adenocarcinoma patients treated with first-line EGFR TKIs. Radiomic features combined with clinical factors provided significant improvements in prognostic performance compared to clinical factors alone and may contribute to better therapeutic decision making for individual patients in clinical practice.

## Supporting information

**S1 Dataset. Radiomic feature data and clinical characteristics of the study population.**  
(XLSX)

**S1 Protocol. CT scanning protocols for adenocarcinoma patients treated with EGFR TKIs and a CT scanning protocol for a separate group of patients with solid pulmonary nodule to analyze inter-reader intraclass correlation coefficients of radiomic features.**  
(DOCX)

## Acknowledgments

We thank Myunghee Lee for her contribution to nodule segmentation and data acquisition.

## Author Contributions

**Conceptualization:** Hyungjin Kim, Chang Min Park, Bhumsuk Keam.

**Data curation:** Hyungjin Kim, Chang Min Park, Sang Joon Park.

**Formal analysis:** Hyungjin Kim.

**Funding acquisition:** Chang Min Park.

**Investigation:** Hyungjin Kim, Chang Min Park, Bhumsuk Keam, Sang Joon Park, Miso Kim, Tae Min Kim, Dong-Wan Kim, Dae Seog Heo, Jin Mo Goo.

**Methodology:** Hyungjin Kim, Chang Min Park, Bhumsuk Keam, Sang Joon Park, Miso Kim, Tae Min Kim, Dong-Wan Kim, Dae Seog Heo, Jin Mo Goo.

**Project administration:** Hyungjin Kim, Chang Min Park, Bhumsuk Keam.

**Resources:** Chang Min Park, Bhumsuk Keam, Sang Joon Park, Miso Kim, Tae Min Kim, Dong-Wan Kim, Dae Seog Heo, Jin Mo Goo.

**Software:** Sang Joon Park.

**Supervision:** Hyungjin Kim, Chang Min Park, Bhumsuk Keam.

**Writing – original draft:** Hyungjin Kim, Chang Min Park, Bhumsuk Keam.

**Writing – review & editing:** Hyungjin Kim, Chang Min Park, Bhumsuk Keam, Sang Joon Park, Miso Kim, Tae Min Kim, Dong-Wan Kim, Dae Seog Heo, Jin Mo Goo.

## References

1. Stewart EL, Tan SZ, Liu G, Tsao MS. Known and putative mechanisms of resistance to EGFR targeted therapies in NSCLC patients with EGFR mutations—a review. *Transl Lung Cancer Res.* 2015; 4: 67–81. <https://doi.org/10.3978/j.issn.2218-6751.2014.11.06> PMID: 25806347
2. Lin Y, Wang X, Jin H. EGFR-TKI resistance in NSCLC patients: mechanisms and strategies. *Am J Cancer Res.* 2014; 4: 411–435. PMID: 25232485
3. Zhou C, Wu YL, Chen G, Feng J, Liu XQ, Wang C, et al. Erlotinib versus chemotherapy as first-line treatment for patients with advanced EGFR mutation-positive non-small-cell lung cancer (OPTIMAL, CTONG-0802): a multicentre, open-label, randomised, phase 3 study. *Lancet Oncol.* 2011; 12: 735–742. [https://doi.org/10.1016/S1470-2045\(11\)70184-X](https://doi.org/10.1016/S1470-2045(11)70184-X) PMID: 21783417
4. Benz MR, Herrmann K, Walter F, Garon EB, Reckamp KL, Figlin R, et al. (18)F-FDG PET/CT for monitoring treatment responses to the epidermal growth factor receptor inhibitor erlotinib. *J Nucl Med.* 2011; 52: 1684–1689. <https://doi.org/10.2967/jnumed.111.095257> PMID: 22045706
5. Cook GJ, O'Brien ME, Siddique M, Chicklore S, Loi HY, Sharma B, et al. Non-small cell lung cancer treated with Erlotinib: heterogeneity of (18)F-FDG uptake at PET—association with treatment response and prognosis. *Radiology.* 2015; 276: 883–893. <https://doi.org/10.1148/radiol.2015141309> PMID: 25897473
6. Lee JH, Lee HY, Ahn MJ, Park K, Ahn JS, Sun JM, et al. Volume-based growth tumor kinetics as a prognostic biomarker for patients with EGFR mutant lung adenocarcinoma undergoing EGFR tyrosine kinase inhibitor therapy: a case control study. *Cancer Imaging.* 2016; 16: 5. <https://doi.org/10.1186/s40644-016-0063-7> PMID: 26984681
7. Nishino M, Dahlberg SE, Cardarella S, Jackman DM, Rabin MS, Hatabu H, et al. Tumor volume decrease at 8 weeks is associated with longer survival in EGFR-mutant advanced non-small-cell lung cancer patients treated with EGFR TKI. *J Thorac Oncol.* 2013; 8: 1059–1068. <https://doi.org/10.1097/JTO.0b013e318294c909> PMID: 23787800
8. Scheffler M, Zander T, Nogova L, Kobe C, Kahraman D, Dietlein M, et al. Prognostic impact of [18F] fluorothymidine and [18F]fluoro-D-glucose baseline uptakes in patients with lung cancer treated first-

- line with erlotinib. *PLoS One*. 2013; 8: e53081. <https://doi.org/10.1371/journal.pone.0053081> PMID: 23308140
9. Zander T, Scheffler M, Nogova L, Kobe C, Engel-Riedel W, Hellmich M, et al. Early prediction of nonprogression in advanced non-small-cell lung cancer treated with erlotinib by using [(18)F]fluorodeoxyglucose and [(18)F]fluorothymidine positron emission tomography. *J Clin Oncol*. 2011; 29: 1701–1708. <https://doi.org/10.1200/JCO.2010.32.4939> PMID: 21422426
  10. Keam B, Lee SJ, Kim TM, Paeng JC, Lee SH, Kim DW, et al. Total lesion glycolysis in positron emission tomography can predict gefitinib outcomes in non-small-cell lung cancer with activating EGFR mutation. *J Thorac Oncol*. 2015; 10: 1189–1194. <https://doi.org/10.1097/JTO.0000000000000569> PMID: 26200273
  11. Aerts HJ, Velazquez ER, Leijenaar RT, Parmar C, Grossmann P, Carvalho S, et al. Decoding tumour phenotype by noninvasive imaging using a quantitative radiomics approach. *Nat Commun*. 2014; 5: 4006. <https://doi.org/10.1038/ncomms5006> PMID: 24892406
  12. Huang Y, Liu Z, He L, Chen X, Pan D, Ma Z, et al. Radiomics signature: a potential biomarker for the prediction of disease-free survival in early-stage (I or II) non-small cell lung cancer. *Radiology*. 2016; 281: 947–957. <https://doi.org/10.1148/radiol.2016152234> PMID: 27347764
  13. Fried DV, Mawlawi O, Zhang L, Fave X, Zhou S, Ibbott G, et al. Stage III non-small cell lung cancer: prognostic value of FDG PET quantitative imaging features combined with clinical prognostic factors. *Radiology*. 2016; 278: 214–222. <https://doi.org/10.1148/radiol.2015142920> PMID: 26176655
  14. Win T, Miles KA, Janes SM, Ganeshan B, Shastry M, Endozo R, et al. Tumor heterogeneity and permeability as measured on the CT component of PET/CT predict survival in patients with non-small cell lung cancer. *Clin Cancer Res*. 2013; 19: 3591–3599. <https://doi.org/10.1158/1078-0432.CCR-12-1307> PMID: 23659970
  15. Wu YC, Hsu HH, Chang WC, Tung HJ, Ko KH, Hsu YC, et al. Prognostic potential of initial CT changes for progression-free survival in gefitinib-treated patients with advanced adenocarcinoma of the lung: a preliminary analysis. *Eur Radiol*. 2015; 25: 1801–1813. <https://doi.org/10.1007/s00330-014-3579-x> PMID: 25577523
  16. Keam B, Kim DW, Park JH, Lee JO, Kim TM, Lee SH, et al. How molecular understanding affects to prescribing patterns and clinical outcome of gefitinib in non-small cell lung cancer? 10 year experience of single institution. *Cancer Res Treat*. 2013; 45: 178–185. <https://doi.org/10.4143/crt.2013.45.3.178> PMID: 24155676
  17. Keam B, Kim DW, Park JH, Lee JO, Kim TM, Lee SH, et al. Nomogram predicting clinical outcomes in non-small cell lung cancer patients treated with epidermal growth factor receptor tyrosine kinase inhibitors. *Cancer Res Treat*. 2014; 46: 323–330. <https://doi.org/10.4143/crt.2013.120> PMID: 25036571
  18. Park S, Keam B, Kim SH, Kim KH, Kim YJ, Kim JS, et al. Pemetrexed singlet versus nonpemetrexed-based platinum doublet as second-line chemotherapy after first-line epidermal growth factor receptor (EGFR) tyrosine kinase inhibitor failure in non-small cell lung cancer patients with EGFR mutations. *Cancer Res Treat*. 2015; 47: 630–637. <https://doi.org/10.4143/crt.2014.244> PMID: 25687850
  19. Suh KJ, Keam B, Kim M, Park YS, Kim TM, Jeon YK, et al. Serum neuron-specific enolase levels predict the efficacy of first-line epidermal growth factor receptor (EGFR) tyrosine kinase inhibitors in patients with non-small cell lung cancer harboring EGFR mutations. *Clin Lung Cancer*. 2016; 17: 245–252 e241. <https://doi.org/10.1016/j.clc.2015.11.012> PMID: 26719155
  20. Solomon J, Mileto A, Nelson RC, Roy Choudhury K, Samei E. Quantitative features of liver lesions, lung nodules, and renal stones at multi-detector row CT examinations: dependency on radiation dose and reconstruction algorithm. *Radiology*. 2016; 279: 185–194. <https://doi.org/10.1148/radiol.2015150892> PMID: 26624973
  21. Eisenhauer EA, Therasse P, Bogaerts J, Schwartz LH, Sargent D, Ford R, et al. New response evaluation criteria in solid tumours: revised RECIST guideline (version 1.1). *Eur J Cancer*. 2009; 45: 228–247. <https://doi.org/10.1016/j.ejca.2008.10.026> PMID: 19097774
  22. Ahn SY, Park CM, Park SJ, Kim HJ, Song C, Lee SM, et al. Prognostic value of computed tomography texture features in non-small cell lung cancers treated with definitive concomitant chemoradiotherapy. *Invest Radiol*. 2015; 50: 719–725. <https://doi.org/10.1097/RLI.0000000000000174> PMID: 26020832
  23. Chae HD, Park CM, Park SJ, Lee SM, Kim KG, Goo JM. Computerized texture analysis of persistent part-solid ground-glass nodules: differentiation of preinvasive lesions from invasive pulmonary adenocarcinomas. *Radiology*. 2014; 273: 285–293. <https://doi.org/10.1148/radiol.14132187> PMID: 25102296
  24. Kim H, Park CM, Park SJ, Song YS, Lee JH, Hwang EJ, et al. Temporal changes of texture features extracted from pulmonary nodules on dynamic contrast-enhanced chest computed tomography: how influential is the scan delay? *Invest Radiol*. 2016; 51: 569–574. <https://doi.org/10.1097/RLI.0000000000000267> PMID: 27504795

25. Song YS, Park CM, Park SJ, Lee SM, Jeon YK, Goo JM. Volume and mass doubling times of persistent pulmonary subsolid nodules detected in patients without known malignancy. *Radiology*. 2014; 273: 276–284. <https://doi.org/10.1148/radiol.14132324> PMID: 24927472
26. Yoon SH, Park CM, Park SJ, Yoon JH, Hahn S, Goo JM. Tumor heterogeneity in lung cancer: assessment with dynamic contrast-enhanced MR imaging. *Radiology*. 2016; 280: 940–948. <https://doi.org/10.1148/radiol.2016151367> PMID: 27031994
27. Budczies J, Klauschen F, Sinn BV, Gyorffy B, Schmitt WD, Darb-Esfahani S, et al. Cutoff Finder: a comprehensive and straightforward Web application enabling rapid biomarker cutoff optimization. *PLoS One*. 2012; 7: e51862. <https://doi.org/10.1371/journal.pone.0051862> PMID: 23251644
28. Harrell FE Jr. Regression modelling strategies: With applications to linear models, logistic and ordinal regression, and survival analysis. 2nd ed. New York: Springer-Verlag; 2015.
29. Ravanelli M, Farina D, Morassi M, Roca E, Cavalleri G, Tassi G, et al. Texture analysis of advanced non-small cell lung cancer (NSCLC) on contrast-enhanced computed tomography: prediction of the response to the first-line chemotherapy. *Eur Radiol*. 2013; 23: 3450–3455. <https://doi.org/10.1007/s00330-013-2965-0> PMID: 23835926
30. Ganeshan B, Panayiotou E, Burnand K, Dizdarevic S, Miles K. Tumour heterogeneity in non-small cell lung carcinoma assessed by CT texture analysis: a potential marker of survival. *Eur Radiol*. 2012; 22: 796–802. <https://doi.org/10.1007/s00330-011-2319-8> PMID: 22086561
31. Sundaresan TK, Sequist LV, Heymach JV, Riely GJ, Janne PA, Koch WH, et al. Detection of T790M, the acquired resistance EGFR mutation, by tumor biopsy versus noninvasive blood-based analyses. *Clin Cancer Res*. 2016; 22: 1103–1110. <https://doi.org/10.1158/1078-0432.CCR-15-1031> PMID: 26446944
32. Takeda M, Okamoto I, Nakagawa K. Survival outcome assessed according to tumor response and shrinkage pattern in patients with EGFR mutation-positive non-small-cell lung cancer treated with gefitinib or erlotinib. *J Thorac Oncol*. 2014; 9: 200–204. <https://doi.org/10.1097/JTO.0000000000000053> PMID: 24419417
33. Bullard JW, Garboczi EJ. Defining shape measures for 3D star-shaped particles: Sphericity, roundness, and dimensions. *Powder Technol*. 2013; 249: 241–252.
34. Fu WJ, Carroll RJ, Wang S. Estimating misclassification error with small samples via bootstrap cross-validation. *Bioinformatics*. 2005; 21: 1979–1986. <https://doi.org/10.1093/bioinformatics/bti294> PMID: 15691862
35. Mackin D, Fave X, Zhang L, Fried D, Yang J, Taylor B, et al. Measuring computed tomography scanner variability of radiomics features. *Invest Radiol*. 2015; 50: 757–765. <https://doi.org/10.1097/RLI.000000000000180> PMID: 26115366
36. Fave X, Cook M, Frederick A, Zhang L, Yang J, Fried D, et al. Preliminary investigation into sources of uncertainty in quantitative imaging features. *Comput Med Imaging Graph*. 2015; 44: 54–61. <https://doi.org/10.1016/j.compmedimag.2015.04.006> PMID: 26004695
37. Zhao B, Tan Y, Tsai WY, Qi J, Xie C, Lu L, et al. Reproducibility of radiomics for deciphering tumor phenotype with imaging. *Sci Rep*. 2016; 6: 23428. <https://doi.org/10.1038/srep23428> PMID: 27009765
